# Supplementary material
Source: PubMed Central journal article supplement (PMC2818244)

Xie et al., Fig. S1

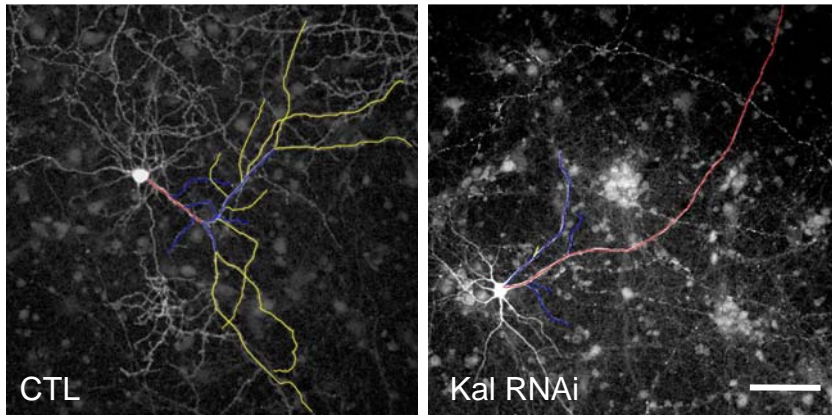

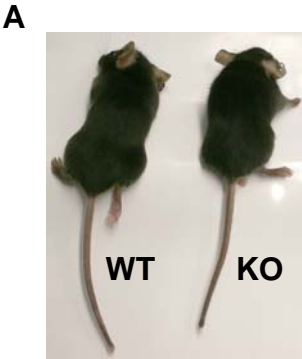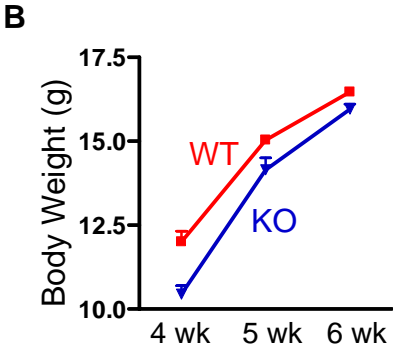

Xie et al., Fig. S3

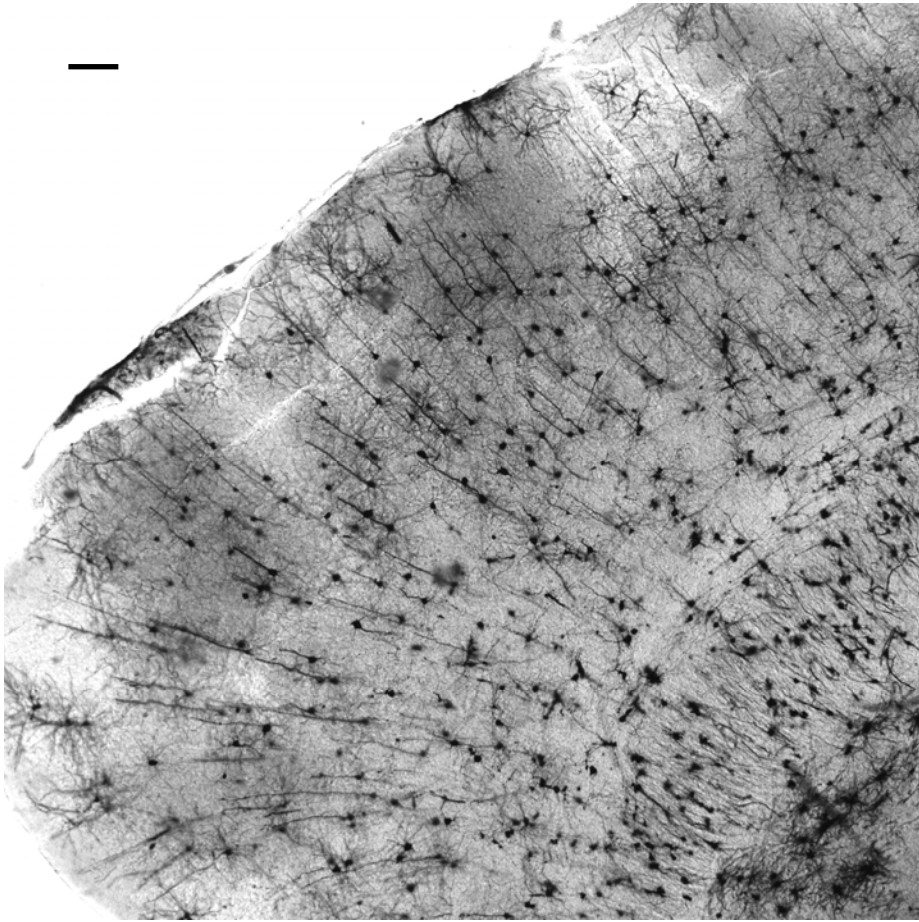

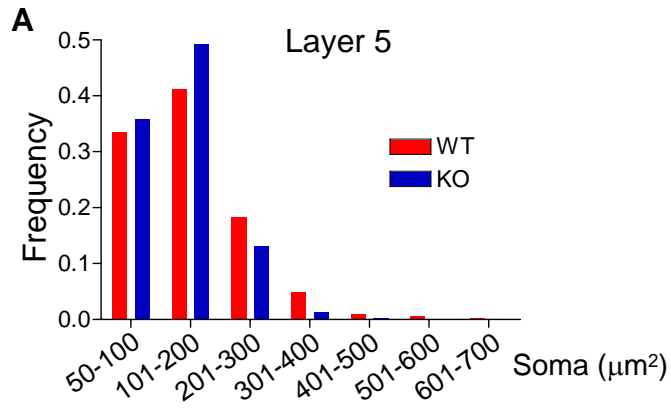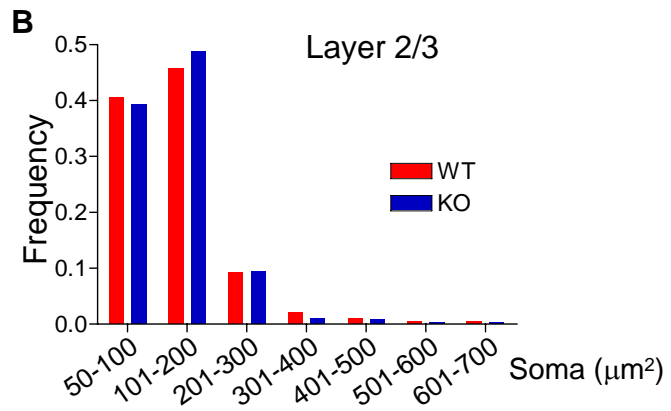

Supplement: NIHMS150601-supplement-2.pdf [file NIHMS150601-supplement-2.pdf]
